# Supplementary material for: Eukaryotic translation initiation factor 6 overexpression plays a major role in the translational control of gallbladder cancer
Source: Springer Nature journal article supplement (doi:10.1007/s00432-019-03030-x), 2019-10-04

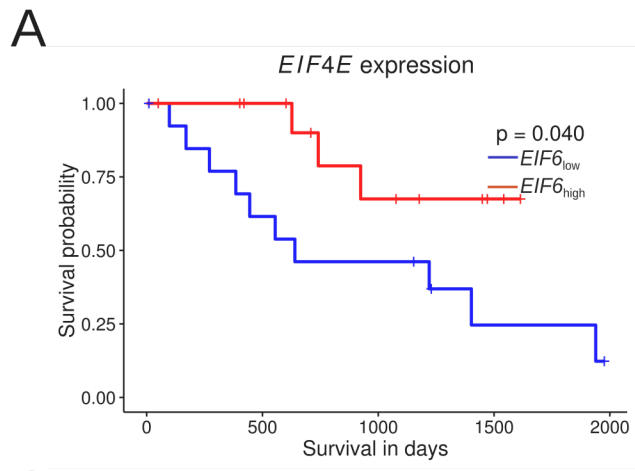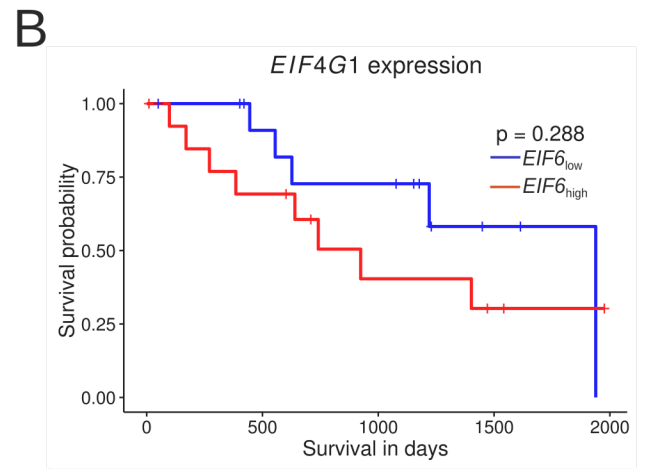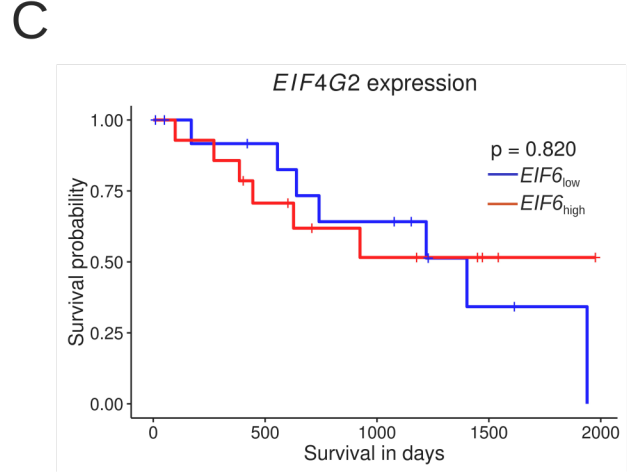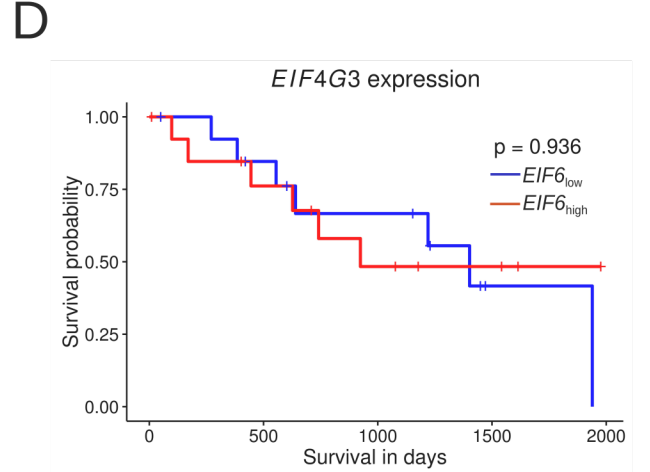

Supplement: MOESM2 [file 17241952]
